## **Title: Intracortical Microstimulation Elicits Human Fingertip Sensations**

**Authors:** Matthew S. Fifer<sup>1\*†</sup>, David P. McMullen<sup>2†</sup>, Tessy M. Thomas<sup>3</sup>, Luke E. Osborn<sup>1</sup>, Robert Nickl<sup>4</sup>, Daniel N. Candrea<sup>3</sup>, Eric A. Pohlmeier<sup>1</sup>, Margaret C. Thompson<sup>1</sup>, Manuel Anaya<sup>4</sup>, Wouter Schellekens<sup>5</sup>, Nick F. Ramsey<sup>5</sup>, Sliman J. Bensmaia<sup>6</sup>, William S. Anderson<sup>7</sup>, Brock A. Wester<sup>1</sup>, Nathan E. Crone<sup>8</sup>, Pablo A. Celnik<sup>4</sup>, Gabriela L. Cantarero<sup>4</sup>, Francesco V. Tenore<sup>1</sup>

### **Affiliations:**

<sup>1</sup>Research and Exploratory Development Department, Johns Hopkins University Applied Physics Laboratory, Laurel, MD, 20723, USA

<sup>2</sup>National Institute of Mental Health, National Institutes of Health, Bethesda, MD, 20892, USA

<sup>3</sup>Department of Biomedical Engineering, Johns Hopkins University, Baltimore, MD, 21205, USA

<sup>4</sup>Department of Physical Medicine and Rehabilitation, Johns Hopkins University, Baltimore, MD, 21205, USA <sup>5</sup>UMC Utrecht Brain Center, Utrecht, Netherlands

<sup>6</sup>Department of Organismal Biology and Anatomy, University of Chicago, Chicago, IL, 60637, USA

<sup>7</sup>Department of Neurosurgery, Johns Hopkins University, Baltimore, MD, 21205, USA

<sup>8</sup>Department of Neurology, Johns Hopkins University, Baltimore, MD, 21205, USA

\*Please direct inquiries to: [matthew.fifer@jhuapl.edu](mailto:matthew.fifer@jhuapl.edu)

†These authors contributed equally to this work

An earlier version of this manuscript was removed owing to inclusion of confidential information relating to an individual
